# Supplementary material for: Flow Synthesis of L-α-Glycerylphosphorylcholine: Studies on Synthetic Routes Applicable to a Flow Reactor and Optimization of Reaction Conditions
Source: MDPI journal article supplement (doi:10.3390/pharmaceutics14112480), 2022-11-16
Supplement: s1 [file s1]

# Supporting Information for

## Flow Synthesis of L- $\alpha$ -Glycerylphosphorylcholine: Studies on Synthetic Routes Applicable to a Flow Reactor and Optimization of Reaction Conditions

Jihun Park <sup>1</sup>, Seungjae Lee <sup>2</sup>, Gyungtak Kim <sup>1</sup>, Yashwardhan R. Malpani <sup>2</sup>,  
Boyoung Y. Park <sup>3</sup> and Ye-Jin Hwang <sup>1,\*</sup>

*1 Department of Chemistry and Chemical Engineering, Education and Research Center for Smart Energy and Materials, Inha University, 100 Inha-ro, Michugol-gu, Incheon 22212, Republic of Korea*

*2 API Synthesis Team, Daewoong-Bio Incorporated, 29-Jeyakdanji-ro, Hyangnam-eup, Hwaseong-si 18608, Republic of Korea*

*3 College of Pharmacy, Kyung Hee University, 26 Kyughee-daero, Dongdaemun-gu, Seoul 02447, Republic of Korea*

\* Correspondence: yjhwang@inha.ac.kr; Tel.: +82-32-860-7464

## Material synthesis

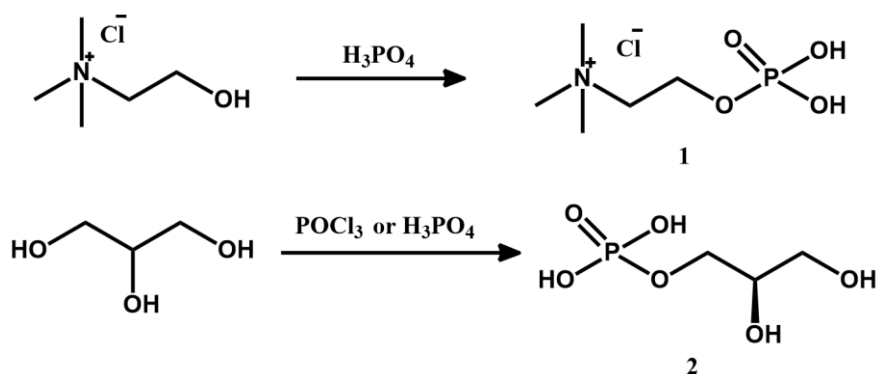

**Scheme S1.** First step reactions to prepare L- $\alpha$ -GPC.

### **N,N,N-trimethyl-2-(phosphonoxy)ethanaminium chloride (compound 1)**

Choline chloride (50 g, 0.358 mol) and phosphoric acid (100 g, 1.02 mol) were mixed in a flask equipped with a Dean-Stark trap. The solution was mixed during warming up to 170 °C for 6 hours. After the reaction was ended, the reaction mixture was dried in vacuo and phosphocholine (0.286 mol, 80%) was obtained as colorless liquid.

### **(R)-2,3-dihydroxypropyl dihydrogen phosphate (compound 2)**

Glycerol (32.8 g, 0.358 mol) and phosphoric acid (100 g, 1.02 mol) were mixed in a flask equipped with a Dean-Stark trap. The solution was mixed during warming up to 170 °C for 6 hours. After the reaction was ended, the reaction mixture was dried in vacuo but (R)-2,3-dihydroxypropyl dihydrogen phosphate was not synthesized.

### **(R)-2,3-dihydroxypropyl dihydrogen phosphate (compound 2)**

POCl<sub>3</sub> (1.75 g, 12.5 mmol) and 2 mL of anhydrous chloroform were mixed in a flask under nitrogen atmosphere and stirred for 10 min at room temperature. Glycerol (0.132 mg, 1.44 mmol) was slowly added to the flask and the reaction was carried out at room temperature for 15 hours. After the reaction was ended, the reaction mixture was quenched by adding deionized water to remove unreacted POCl<sub>3</sub>. The solution was dried in vacuo at 60 °C, but (R)-2,3-dihydroxypropyl dihydrogen phosphate was not synthesized.

## NMR data

**Table S1.** Optimized reaction conditions and conversions of first step reactions in a batch reactor.

| Entry | reactant         | phosphorylation<br>reagent     | solvent                            | temperature<br>(°C) | reaction time<br>(hr) | conversion <sup>a</sup><br>(%) |
|-------|------------------|--------------------------------|------------------------------------|---------------------|-----------------------|--------------------------------|
| 1-1   | choline chloride | POCl <sub>3</sub>              | H <sub>2</sub> O/CHCl <sub>3</sub> | 25                  | 4                     | 86                             |
| 1-2   | Choline chloride | H <sub>3</sub> PO <sub>4</sub> | -                                  | 170                 | 6                     | < 20                           |
| 1-3   | choline chloride | H <sub>3</sub> PO <sub>4</sub> | -                                  | 170                 | 6                     | 80                             |
| 1-4   | glycerol         | POCl <sub>3</sub>              | CHCl <sub>3</sub>                  | 25                  | 15                    | -                              |
| 1-5   | glycerol         | H <sub>3</sub> PO <sub>4</sub> | -                                  | 170                 | 6                     | -                              |

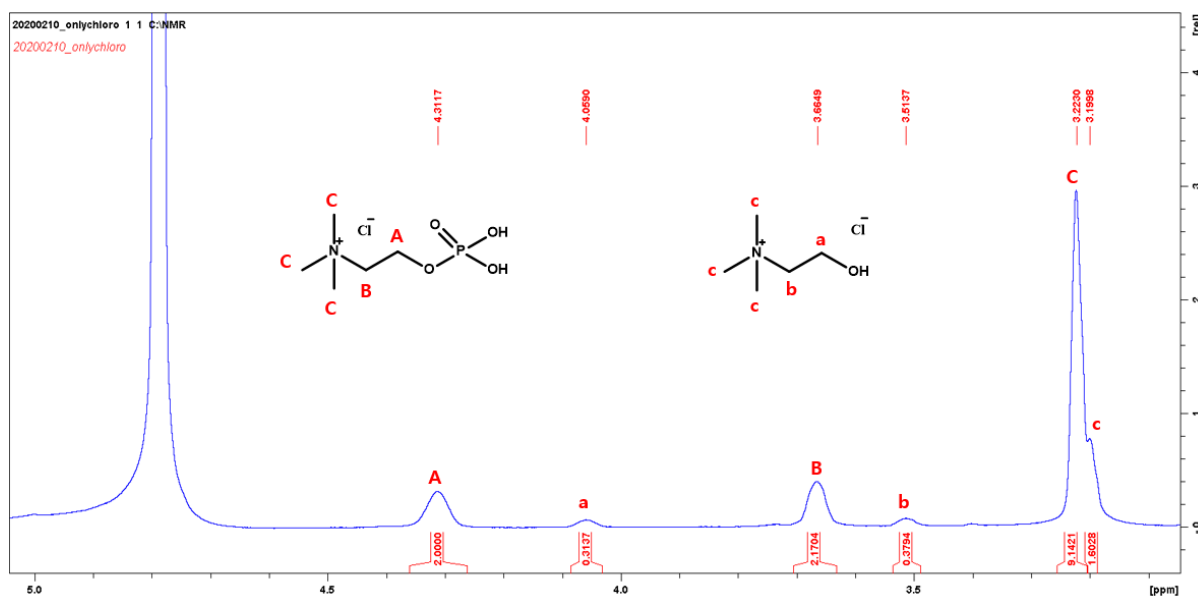

**Figure S1.** <sup>1</sup>H NMR spectrum of entry 1-1.

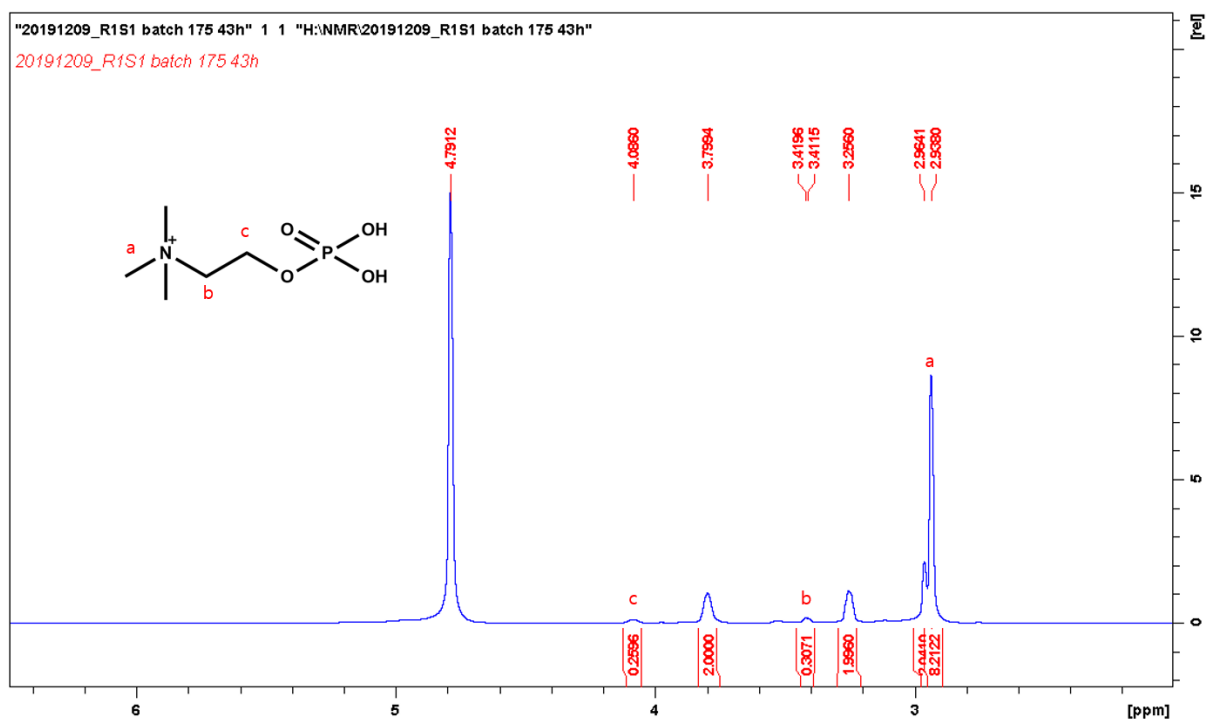

Figure S2.  $^1\text{H}$  NMR spectrum of entry 1-2.

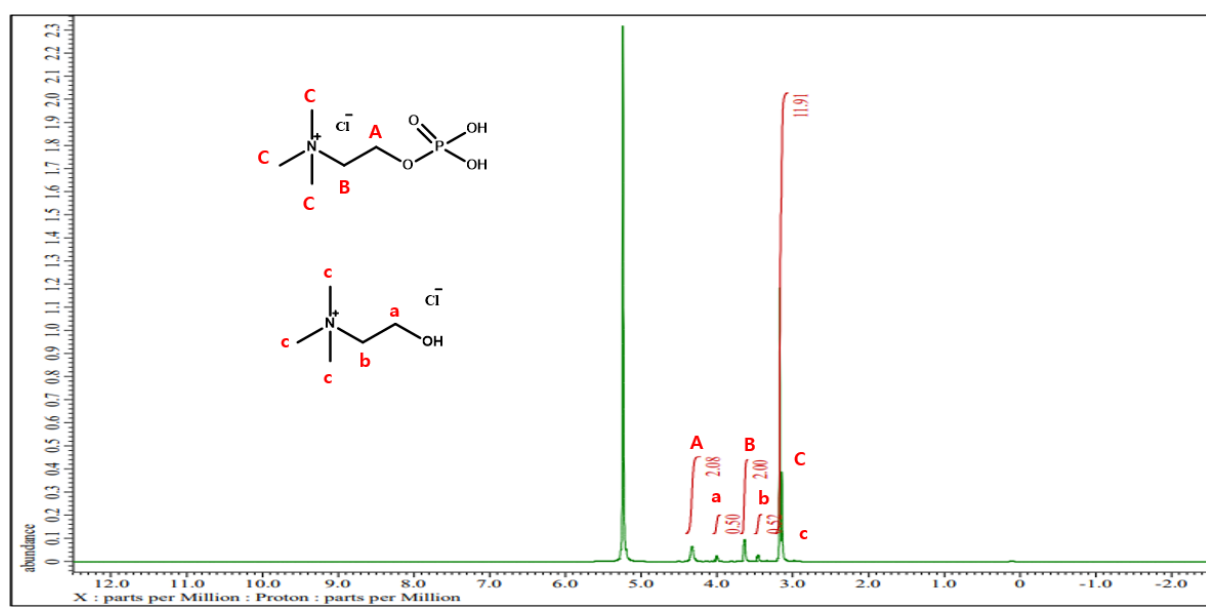

Figure S3.  $^1\text{H}$  NMR spectrum of entry 1-3.

**Table S2.** Reaction conditions and conversions of first step reactions in a flow reactor.

| entry | H <sub>2</sub> O <sup>a</sup><br>(mL) | POCl <sub>3</sub> /<br>choline<br>chloride <sup>b</sup> | reactor<br>volume<br>(mL) | temperature<br>(°C) | flow rate<br>(μL/min) | reaction time | Conversion <sup>c</sup><br>(%) |
|-------|---------------------------------------|---------------------------------------------------------|---------------------------|---------------------|-----------------------|---------------|--------------------------------|
| 2-1   | 0.3                                   | 8                                                       | 22.5                      | 25                  | 31.25                 | 1hr 38min     | 60                             |
| 2-2   | 0.3                                   | 8                                                       | 22.5                      | 0                   | 31.25                 | 4hr           | 8                              |
| 2-3   | 0.3                                   | 8                                                       | 22.5                      | 30                  | 31.25                 | 35min         | 32                             |
| 2-4   | 0.3                                   | 8                                                       | 22.5                      | 35                  | 31.25                 | 30min         | 38                             |
| 2-5   | 0.3                                   | 6                                                       | 22.5                      | 25                  | 31.25                 | 1hr 56min     | 88                             |
| 2-6   | 0.3                                   | 4                                                       | 22.5                      | 25                  | 31.25                 | 2hr 24min     | 36                             |
| 2-7   | 0.15                                  | 6                                                       | 30                        | 25                  | 31.25                 | 3hr 25min     | 97                             |

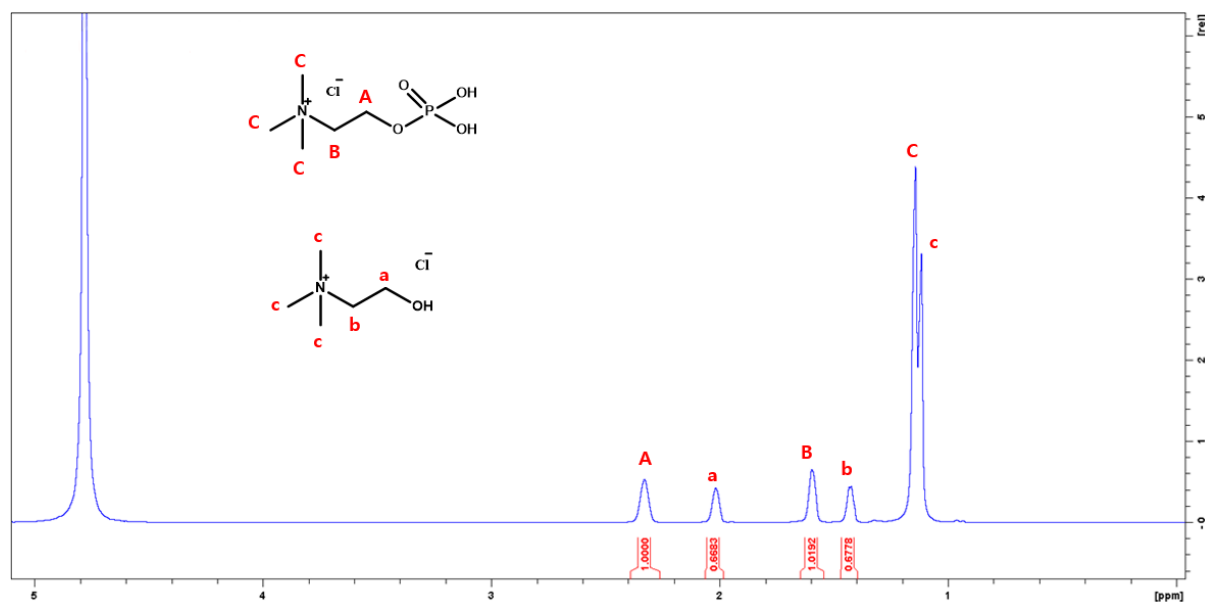

**Figure S4.** <sup>1</sup>H NMR spectrum of entry 2-1.

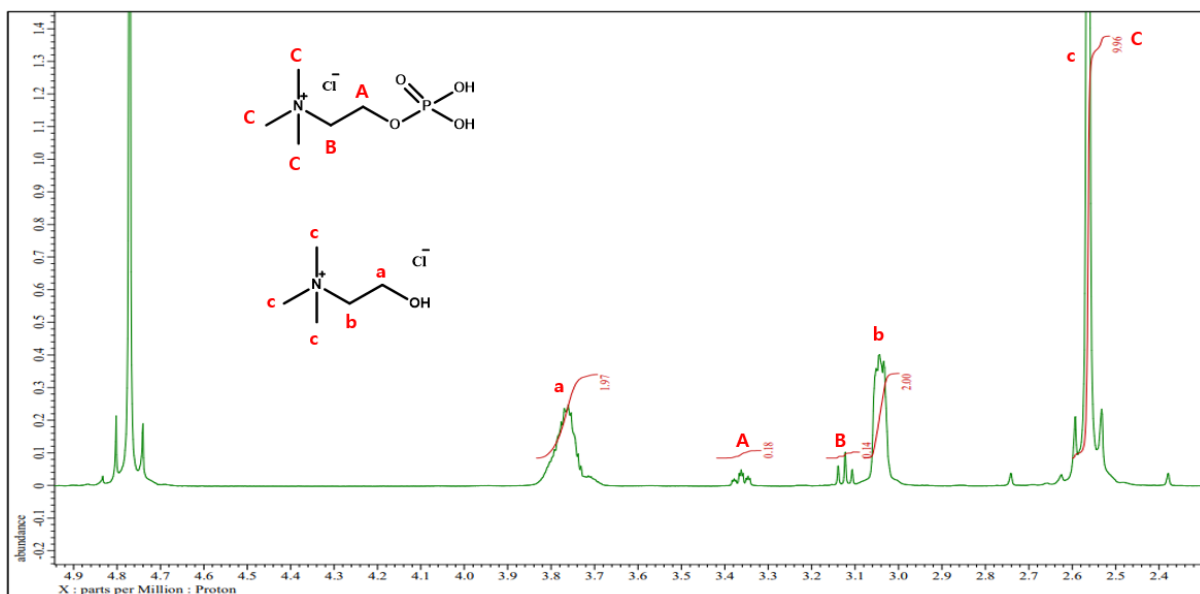

**Figure S5.** <sup>1</sup>H NMR spectrum of entry 2-2.

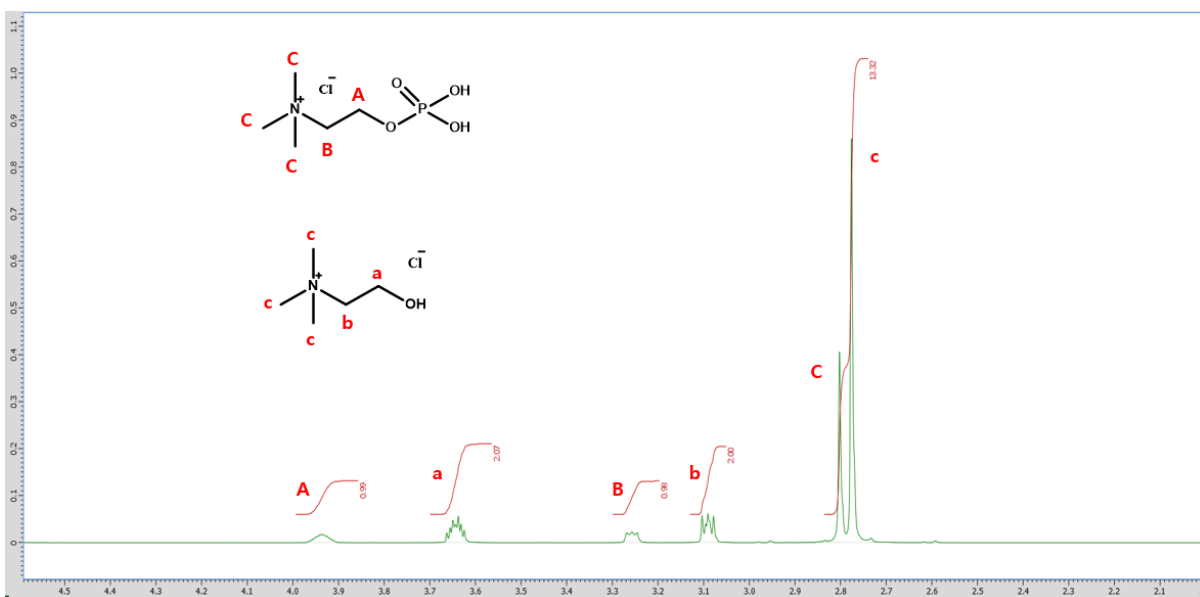

**Figure S6.** <sup>1</sup>H NMR spectrum of entry 2-3.

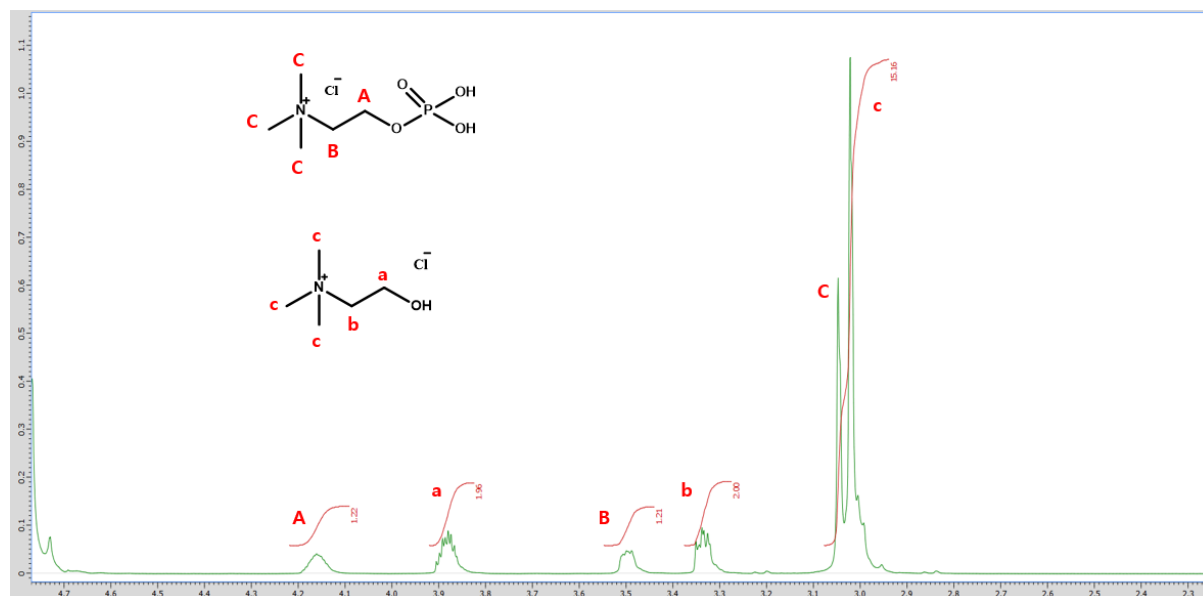

**Figure S7.**  $^1\text{H}$  NMR spectrum of entry 2-4.

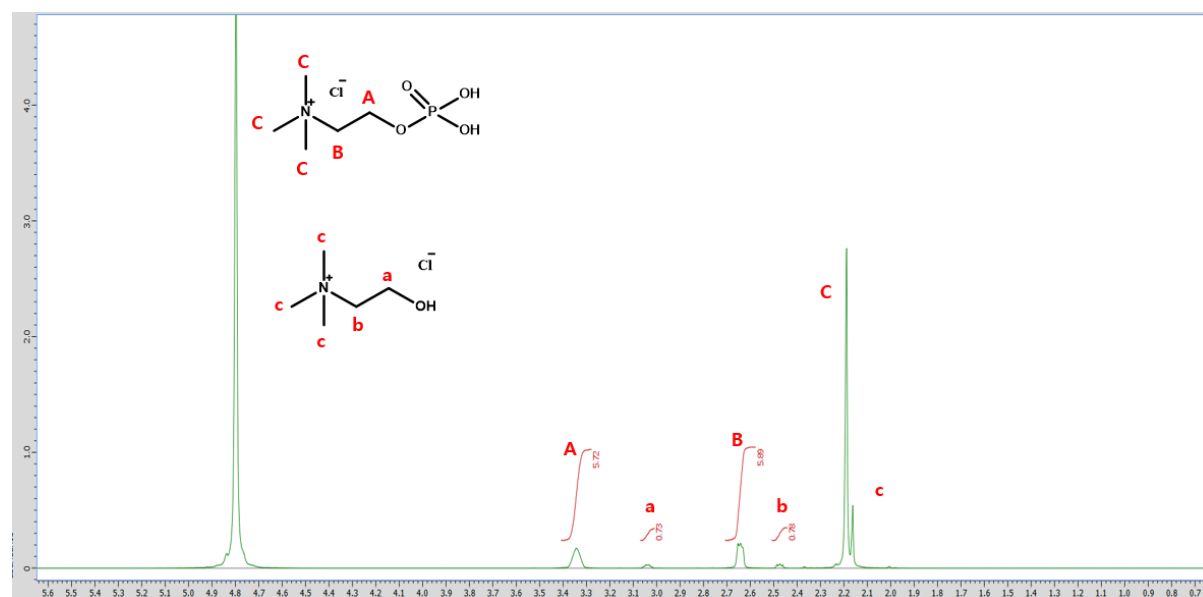

**Figure S8.**  $^1\text{H}$  NMR spectrum of entry 2-5.

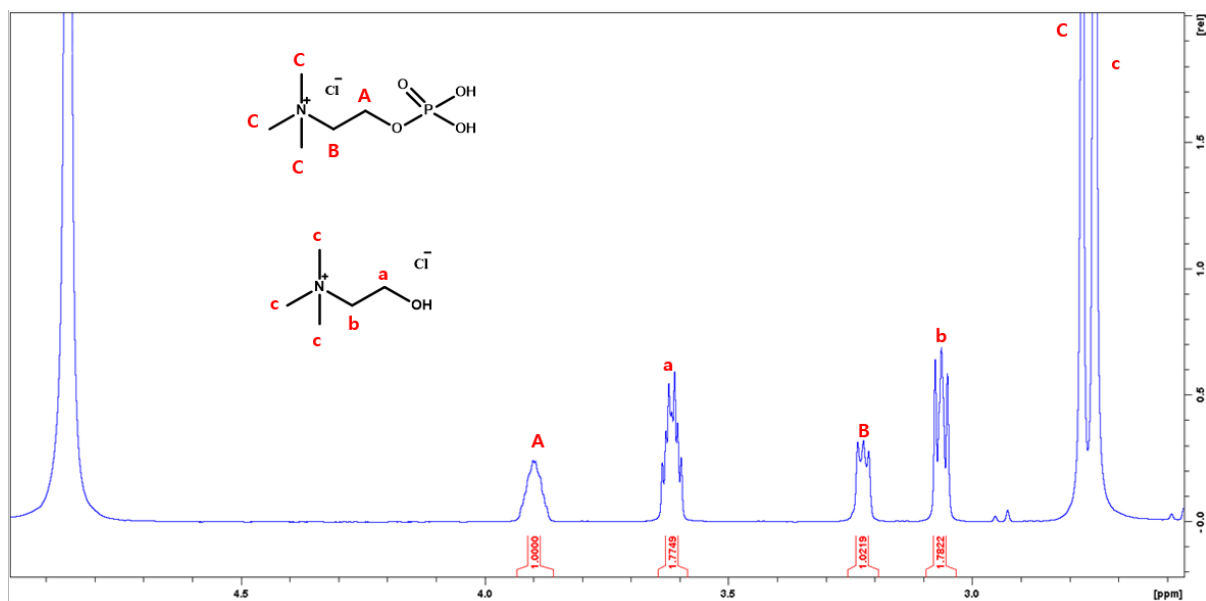

**Figure S9.**  $^1\text{H}$  NMR spectrum of entry 2-6.

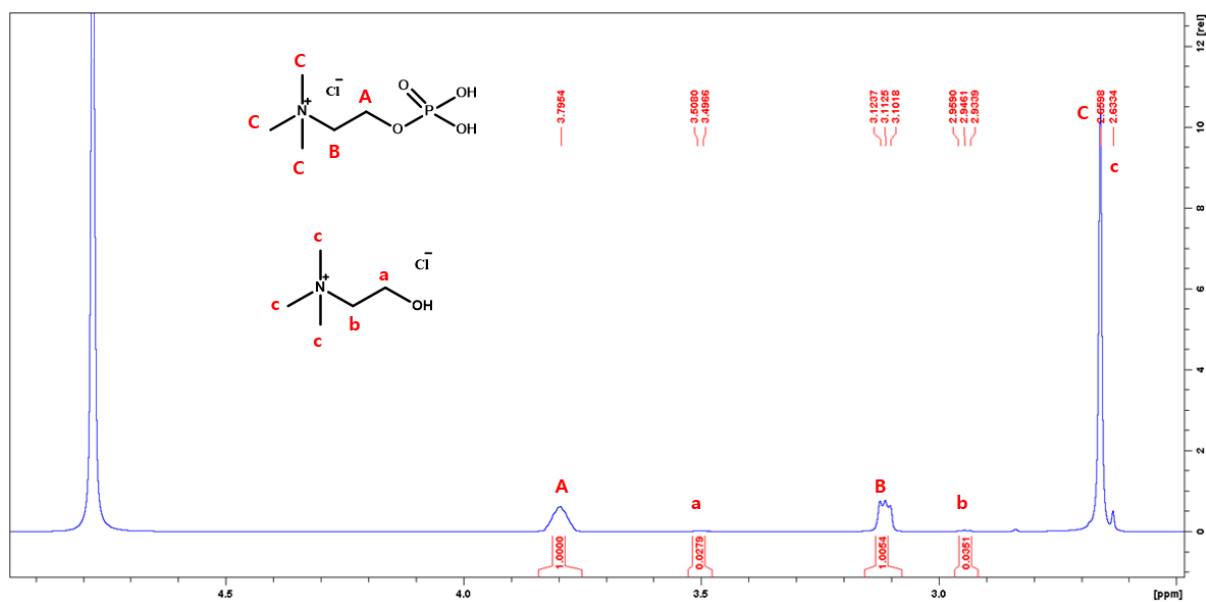

**Figure S10.**  $^1\text{H}$  NMR spectrum of entry 2-7.



**Table S3.** Reaction conditions and conversions of second step reactions in a batch reactor.

| entry | solvent                       | CPD/<br>phosphorylcholine | temperature<br>(°C) | reaction<br>time | conversion<br>(%) |
|-------|-------------------------------|---------------------------|---------------------|------------------|-------------------|
| 3-1   | ethanol                       | 1.14                      | 75                  | 24hr             | 90                |
| 3-2   | H <sub>2</sub> O +<br>ethanol | 1.14                      | 75                  | 24hr             | 98                |

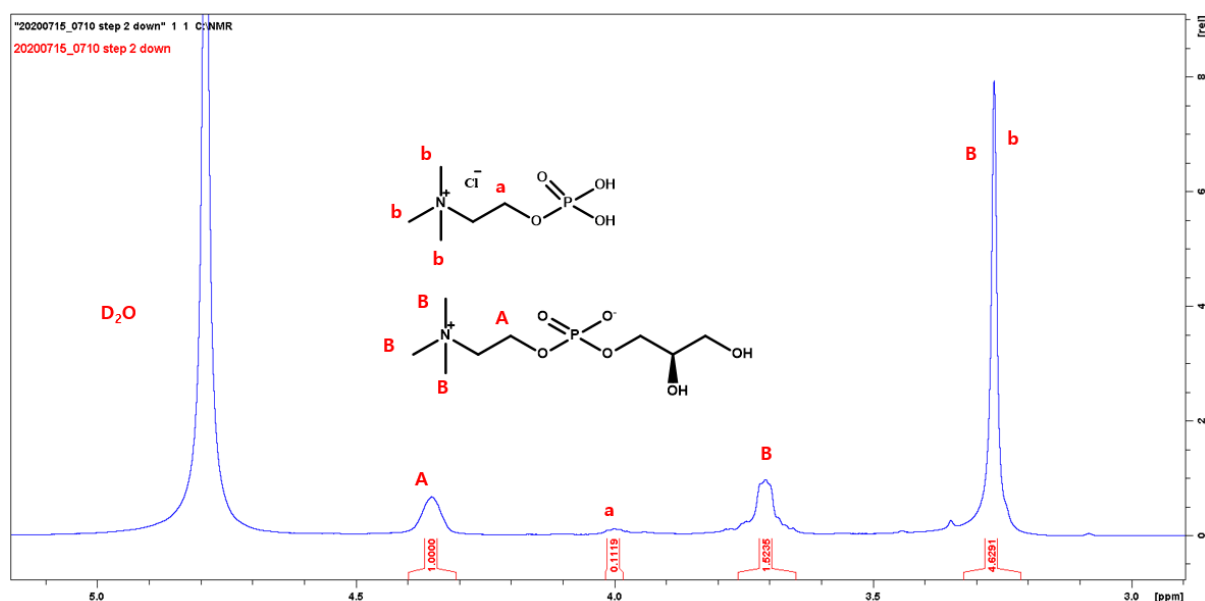

**Figure S11.** <sup>1</sup>H NMR spectrum of entry 3-1.

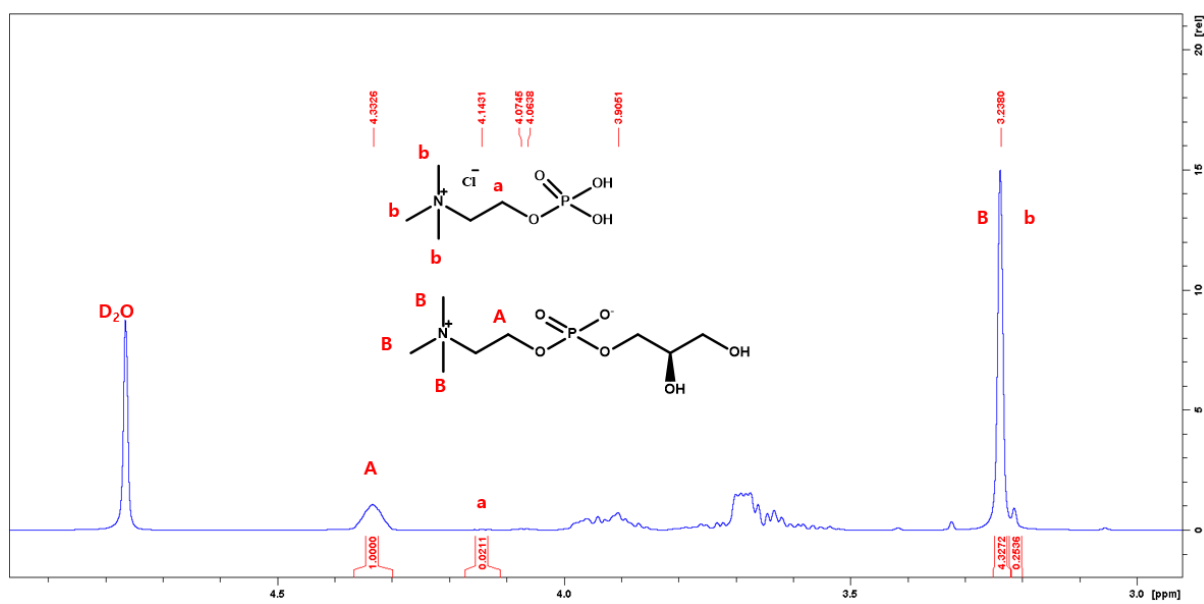

**Figure S12.** <sup>1</sup>H NMR spectrum of entry 3-2.

**Table S4.** Reaction conditions and conversions of second step reactions in a flow reactor.

| entry | H <sub>2</sub> O<br>(mL) | reactor volume<br>(mL) | temperature<br>(°C) | reaction time | Conversion<br>(%) |
|-------|--------------------------|------------------------|---------------------|---------------|-------------------|
| 4-1   | 15                       | 12                     | 75                  | 6hr           | 30                |
| 4-2   | 12                       | 12                     | 75                  | 6hr           | 42                |
| 4-3   | 10                       | 12                     | 75                  | 6hr           | 61                |
| 4-4   | 10                       | 12                     | 80                  | 6hr           | 79                |

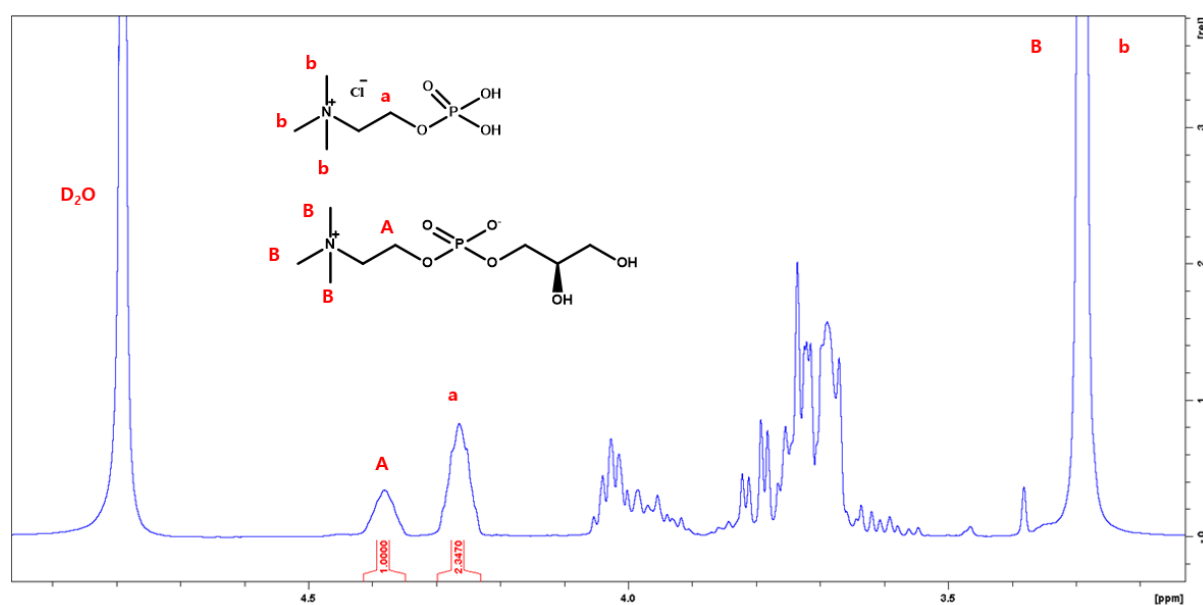

**Figure S13.** <sup>1</sup>H NMR spectrum of entry 4-1.

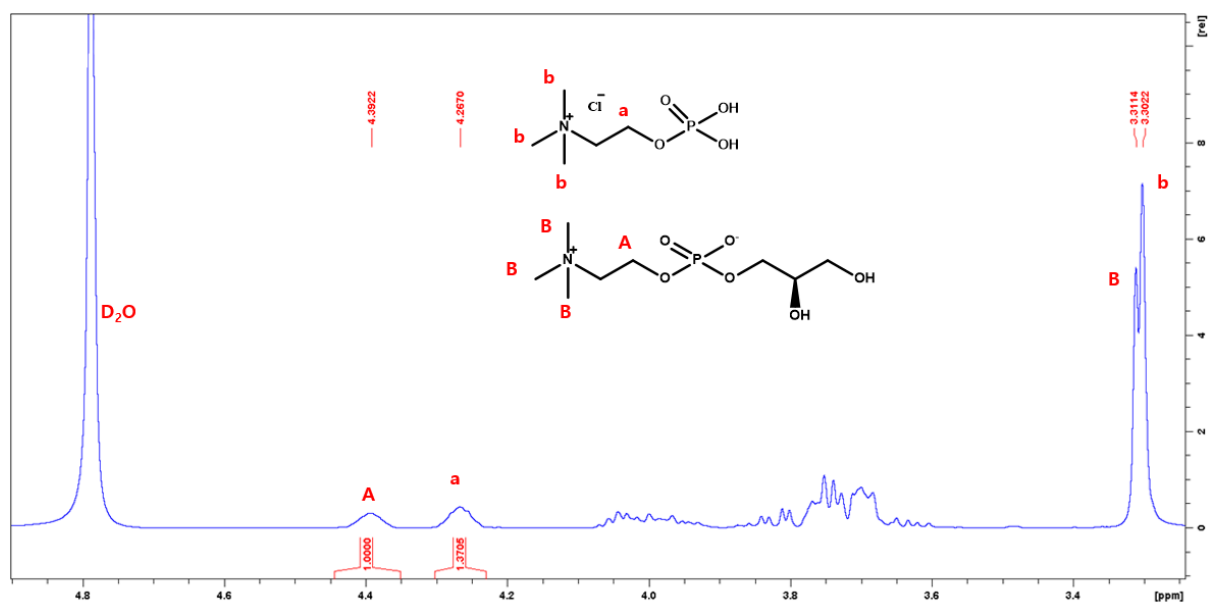

**Figure S14.**  $^1\text{H}$  NMR spectrum of entry 4-2.

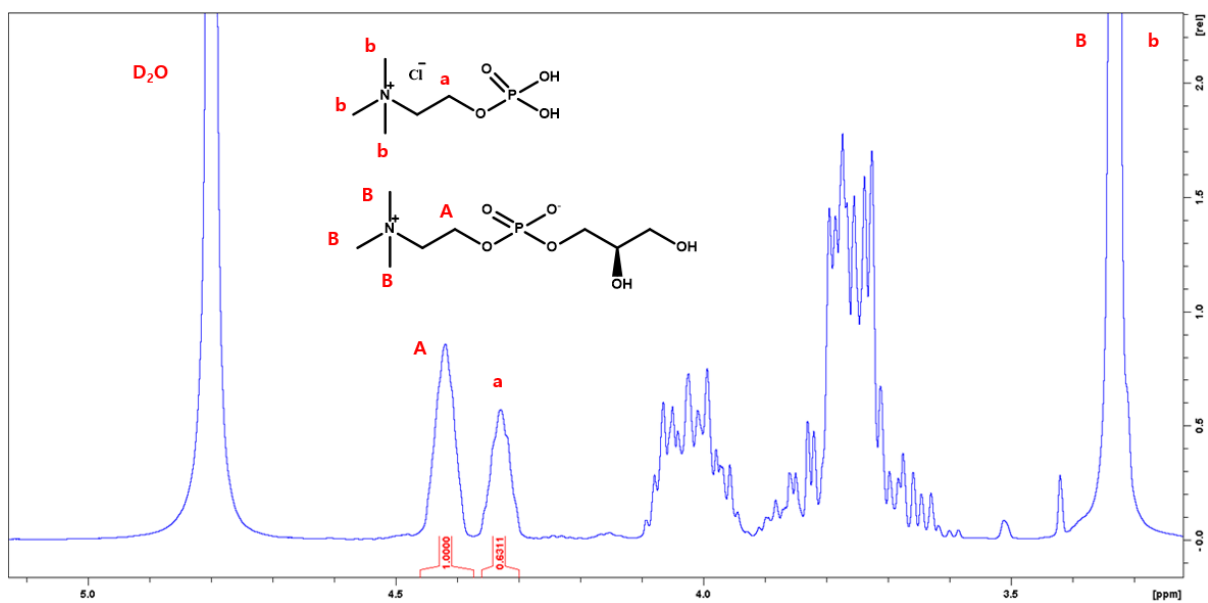

**Figure S15.**  $^1\text{H}$  NMR spectrum of entry 4-3.

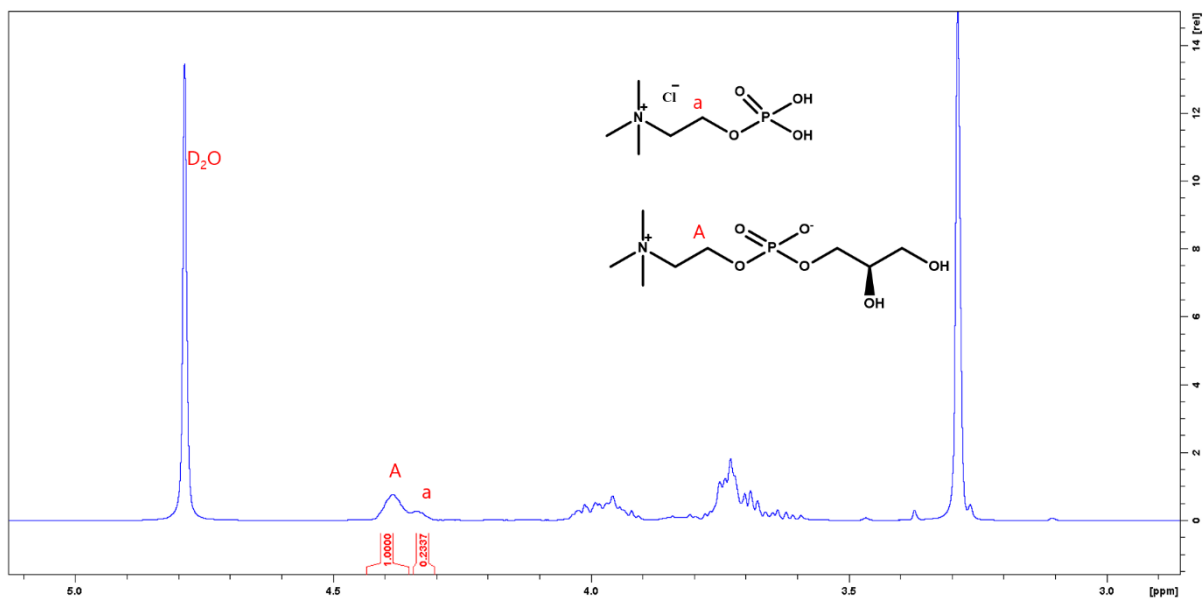

**Figure S16.**  $^1\text{H}$  NMR spectrum of entry 4-4.

**Table S5.** Reproducibility experiment of first step reactions in a flow reactor.

| entry | $\text{H}_2\text{O}$ <sup>a</sup><br>(mL) | $\text{POCl}_3$ /<br>choline<br>chloride <sup>b</sup> | reactor<br>volume<br>(mL) | temperature<br>( $^\circ\text{C}$ ) | flow rate<br>( $\mu\text{L}/\text{min}$ ) | reactn time | Conversion <sup>c</sup><br>(%) |
|-------|-------------------------------------------|-------------------------------------------------------|---------------------------|-------------------------------------|-------------------------------------------|-------------|--------------------------------|
| 1     | 0.15                                      | 6                                                     | 30                        | 25                                  | 31.25                                     | 3hr 25min   | 97                             |
| 2     | 0.15                                      | 6                                                     | 30                        | 25                                  | 31.25                                     | 3hr 13min   | 95.2                           |
| 3     | 0.15                                      | 6                                                     | 30                        | 25                                  | 31.25                                     | 3hr 26min   | 97.3                           |

**Table S6.** Reproducibility experiment of second step reactions in a flow reactor.

| entry | $\text{H}_2\text{O}$<br>(mL) | reactor volume<br>(mL) | temperature<br>( $^\circ\text{C}$ ) | reaction time | Conversion<br>(%) |
|-------|------------------------------|------------------------|-------------------------------------|---------------|-------------------|
| 1     | 10                           | 12                     | 80                                  | 6hr           | 79                |
| 2     | 10                           | 12                     | 80                                  | 6hr           | 76                |
| 3     | 10                           | 12                     | 80                                  | 6hr           | 78                |

# <sup>13</sup>C NMR

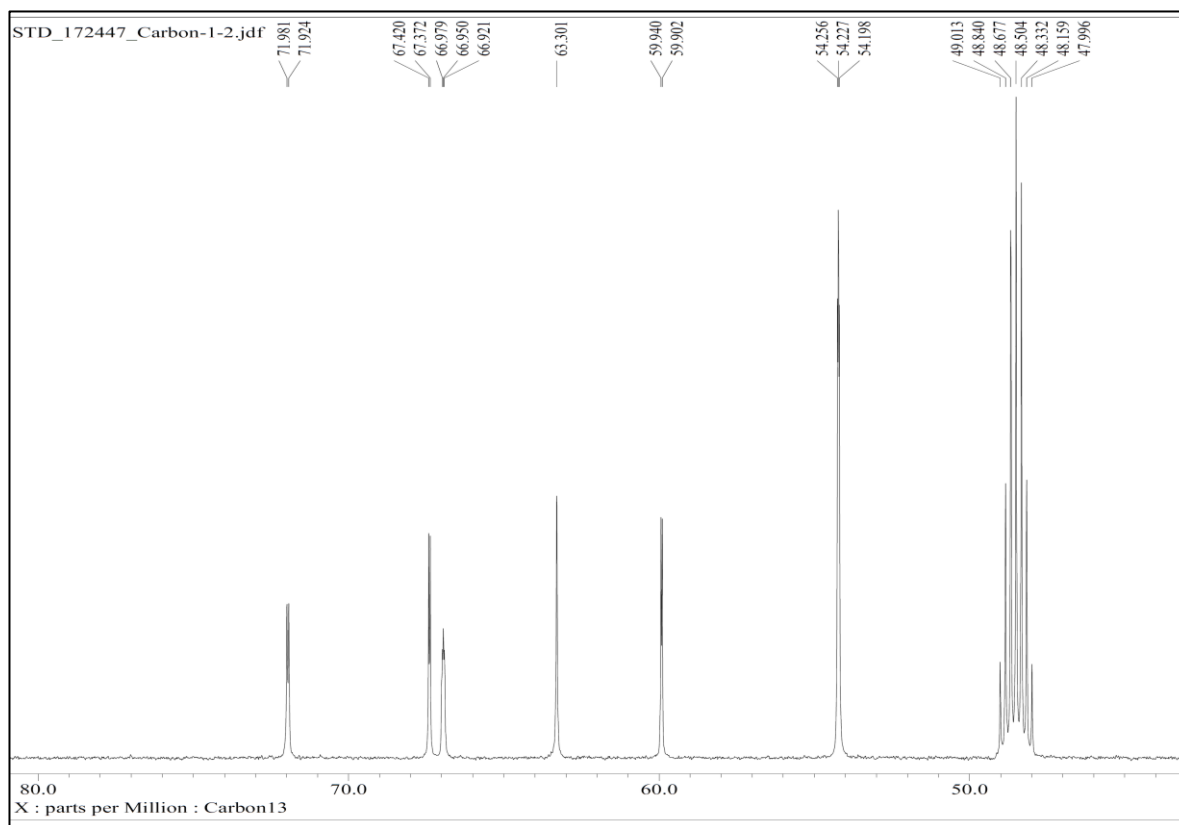

**Figure S17.** <sup>13</sup>C NMR spectrum of choline alfoscerate.

## Mass spectrum

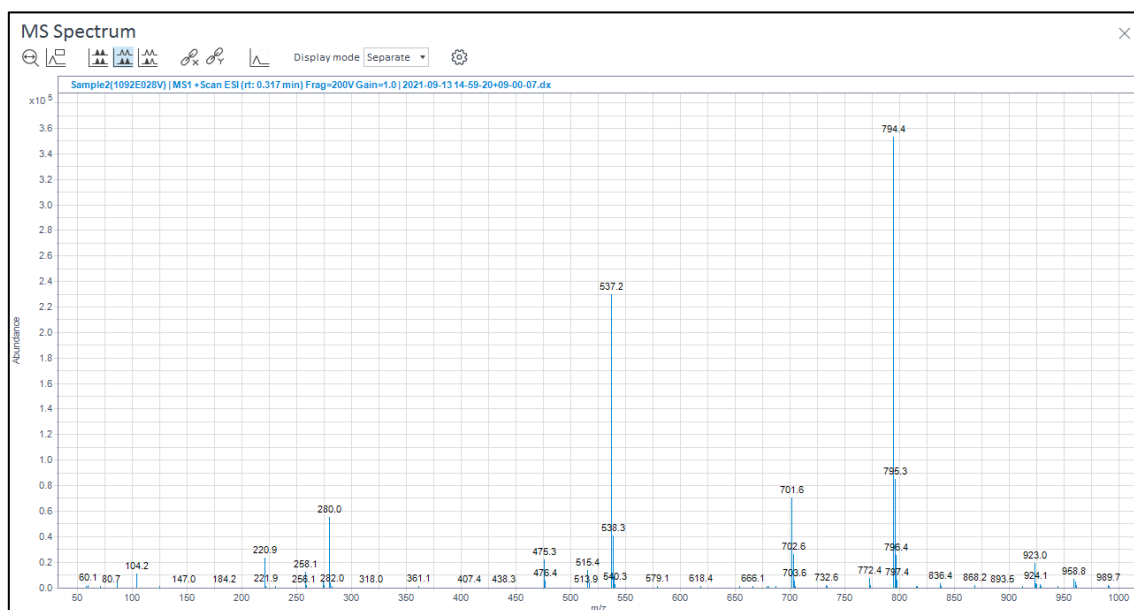

Figure S18. Mass spectrum of choline alfoscerate.

## IR spectrum

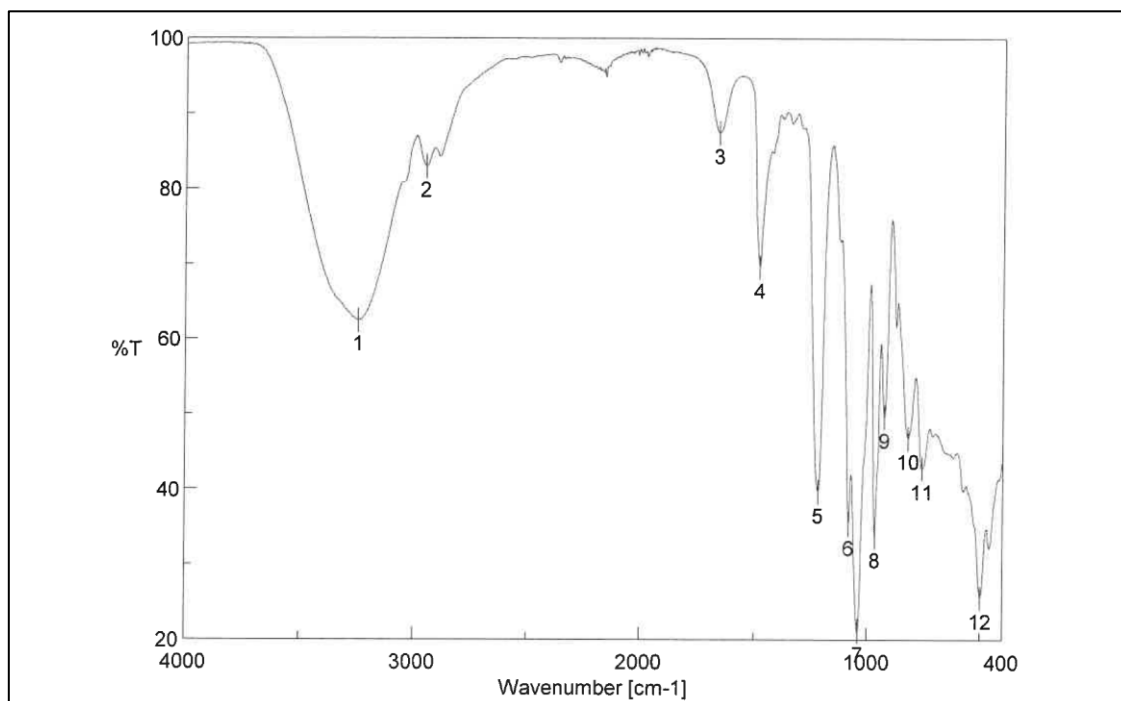

Figure S19. IR spectrum of choline alfoscerate.

## HPLC data

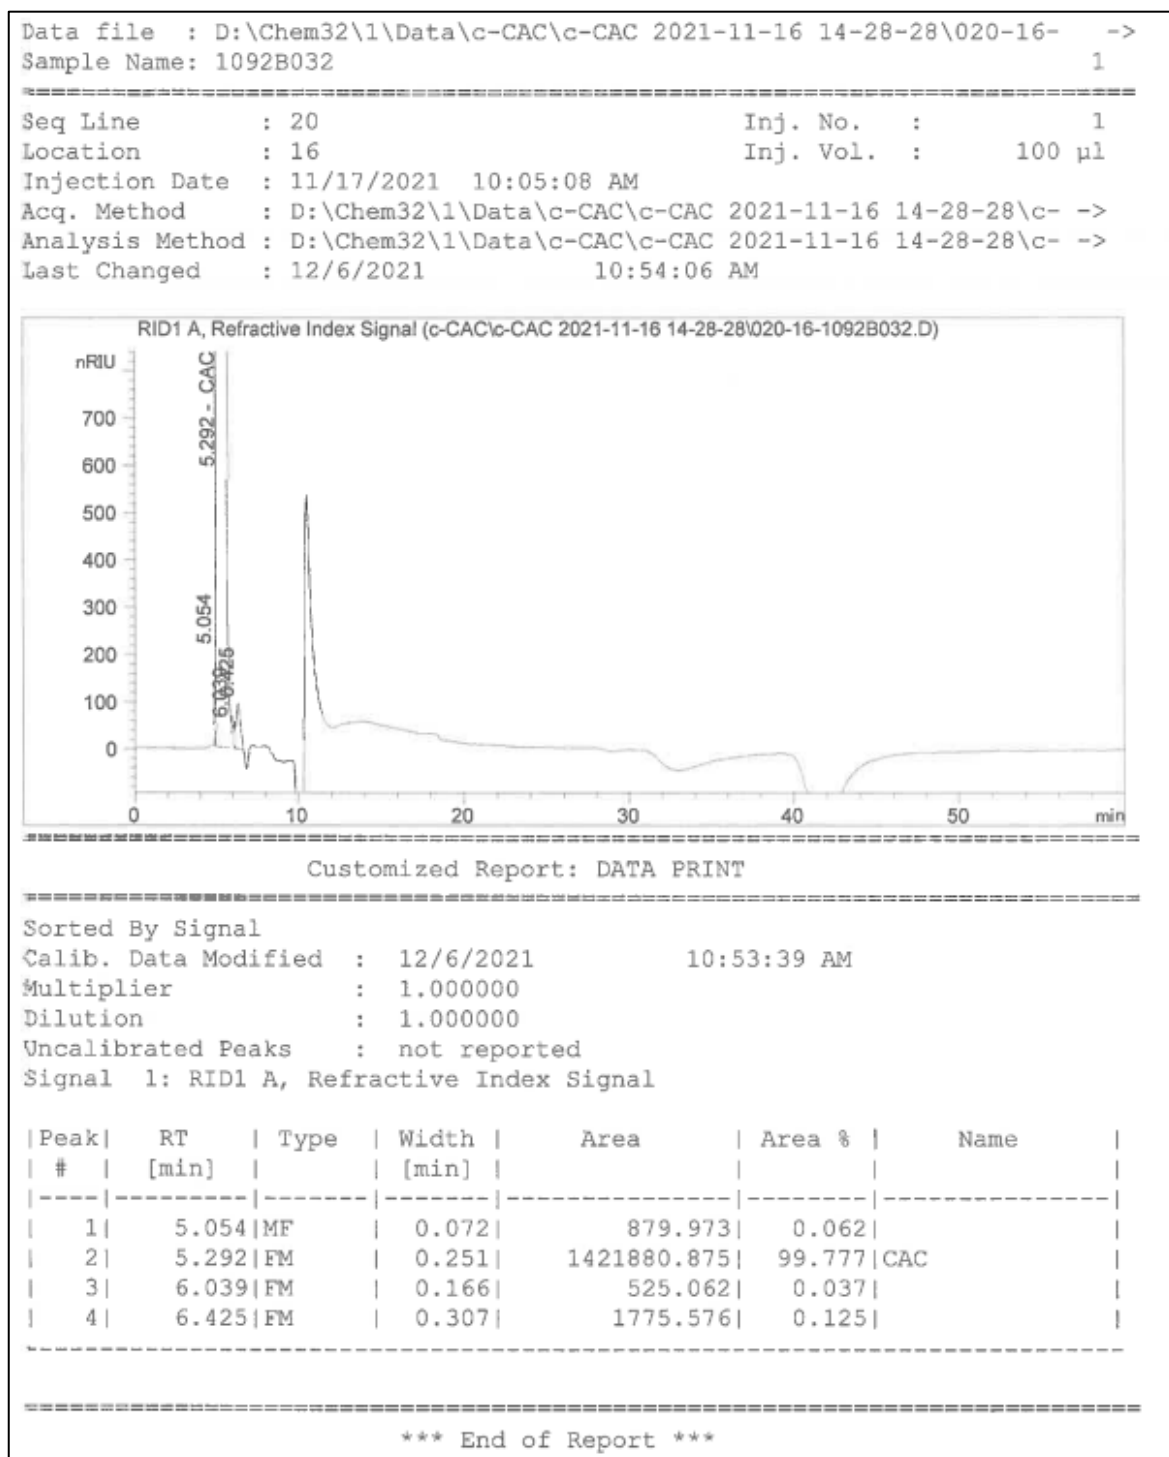

Figure S20. HPLC graph of choline alfoscerate.
